# Supplementary material
Source: PubMed Central journal article supplement (PMC2911282)
Supplement: supp_M109.069054_jbc.M109.069054-1.pdf [file supp_M109.069054_jbc.M109.069054-1.pdf]

## Supporting Information

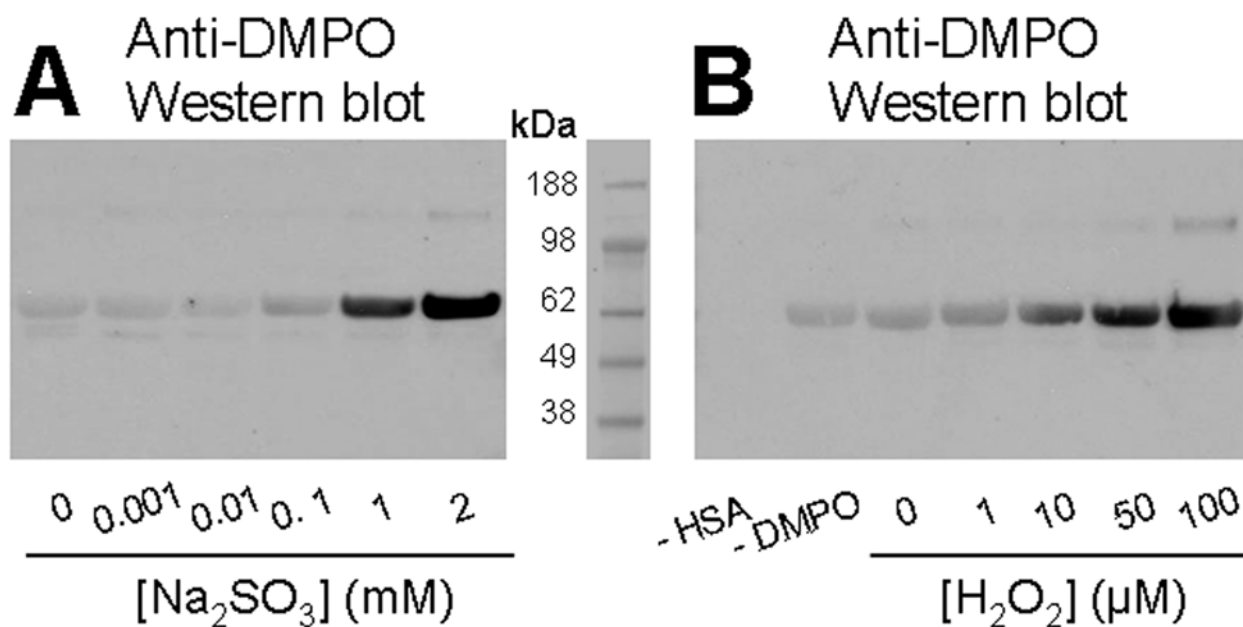

**Fig. S1.** (A) Concentration-dependent effects of Na<sub>2</sub>SO<sub>3</sub> on the formation of HSA radical-derived nitronne adducts by Western blotting. Reactions including HSA (600 μM), H<sub>2</sub>O<sub>2</sub> (100 μM), DMPO (1 mM) and sulfite as indicated were initiated with 1 μM EPO, and the mixtures were incubated for 1 h at 37 °C in 100 mM phosphate buffer (pH 7.4). (B) Concentration-dependent effects of hydrogen peroxide on the formation of HSA radical-derived nitronne adducts by Western blotting. Reactions including HSA (600 μM), Na<sub>2</sub>SO<sub>3</sub> (2 mM), DMPO (1 mM) and H<sub>2</sub>O<sub>2</sub> as indicated were initiated with 1 μM EPO, and the mixtures were incubated for 1 h at 37 °C in 100 mM phosphate buffer (pH 7.4). Each lane contained 3.8 μg of HSA.

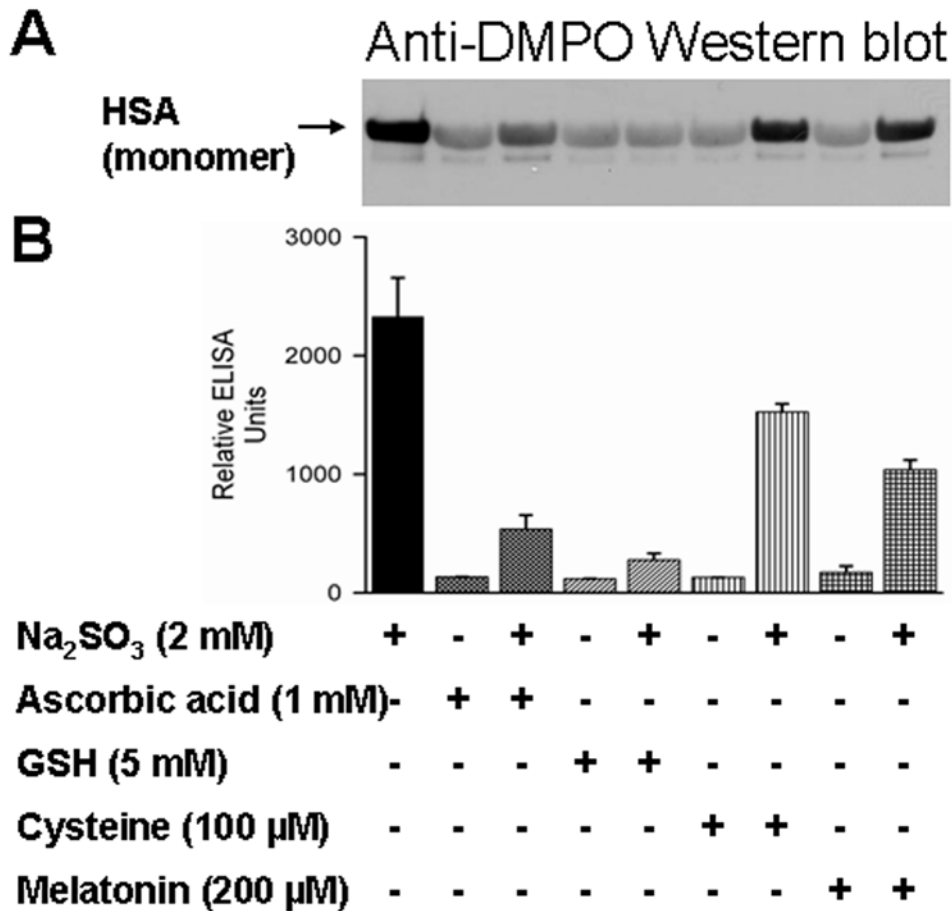

**Fig. S2.** Effect of inhibitors on the formation of DMPO-HSA-derived radical nitron adducts. (A) Western blotting. (B) ELISA. Reaction mixtures containing HSA (600 μM), Na<sub>2</sub>SO<sub>3</sub> (2 mM), DMPO (1 mM), and H<sub>2</sub>O<sub>2</sub> (100 μM) with and without the indicated concentrations of ascorbic acid, GSH, cysteine, and melatonin were initiated by EPO (1 μM). ELISA data presented are the means ± s.d. from three independent determinations using fresh preparations of all reaction components.
